# Supplementary material for: Cross-sectional and Longitudinal Associations Between Objectively Measured Sedentary Time and Metabolic Disease: The Coronary Artery Risk Development in Young Adults (CARDIA) Study
Source: Oxford University Press journal article supplement (doi:10.2337/dc15-0226), 2015-07-09
Supplement: dc150226supplementarydata.pdf [file dc150226supplementarydata.pdf]

SUPPLEMENTARY DATA

**Supplementary Table 1. Cross-sectional Continuous Metabolic Variables (95% Confidence Intervals) by Sedentary Time Category**

|                          | <6 hr/day<br>(n=214)               | 6 to <8 hr/day<br>(n=722)          | 8 to <10 hr/day<br>(n=825)         | ≥10 hr/day<br>(n=266)              | P-for-trend  |
|--------------------------|------------------------------------|------------------------------------|------------------------------------|------------------------------------|--------------|
| Fasting Glucose (mg/dL)  | 95.5<br>(93.3, 97.9)               | 98.0<br>(96.8, 99.2)               | 96.9<br>(95.8, 98.0)               | 97.5<br>(95.3, 99.6)               | 0.792        |
| 2-hour Glucose (mg/dL) † | 98.8<br>(94.0, 103.8)              | 104.0<br>(101.5, 106.7)            | 100.5<br>(98.3, 102.8)             | 104.9<br>(109.7)                   | 0.683        |
| Fasting Insulin (mU/dL)  | <b>7.72</b><br><b>(7.16, 8.33)</b> | <b>8.54</b><br><b>(8.21, 8.88)</b> | <b>8.69</b><br><b>(8.39, 9.01)</b> | <b>9.25</b><br><b>(8.62, 9.93)</b> | <b>0.005</b> |
| HOMA-IR                  | <b>1.82</b><br><b>(1.67, 1.99)</b> | <b>2.07</b><br><b>(1.98, 2.16)</b> | <b>2.08</b><br><b>(2.00, 2.17)</b> | <b>2.22</b><br><b>(2.05, 2.42)</b> | <b>0.012</b> |
| HbA1c (%) ‡              | 5.37<br>(5.27, 5.47)               | 5.47<br>(5.42, 5.53)               | 5.40<br>(5.35, 5.45)               | 5.42<br>(5.33, 5.52)               | 0.728        |

Least square means adjusted for age, center, race, sex, education, income, smoking, alcohol, wear time and log-transformed moderate-to-vigorous-intensity physical activity (total minutes) (Model 2). Adjusted least square means and confidence intervals have been exponentiated (variables were log-transformed for analysis)

†Missing in 400 participants

‡Missing in 261 participants

SUPPLEMENTARY DATA

**Supplementary Table 2. 5-year Changes in Continuous Metabolic Variables (95% Confidence Intervals) by Sedentary Time Category**

|                                     | <6 hr/day<br>(n=190)   | 6 to <8 hr/day<br>(n=602) | 8 to <10 hr/day<br>(n=708) | ≥10 hr/day<br>(n=218) | P-for-trend |
|-------------------------------------|------------------------|---------------------------|----------------------------|-----------------------|-------------|
| Fasting Glucose (mg/dL)             | -1.46<br>(-3.34, 0.42) | -0.13<br>(-1.12, 0.87)    | -0.25<br>(-1.12, 0.65)     | 0.31<br>(-1.48, 2.10) | 0.365       |
| 2-hour Glucose (mg/dL) <sup>†</sup> | 7.40<br>(2.03, 12.77)  | 4.35<br>(1.67, 7.02)      | 4.51<br>(2.12, 6.90)       | 3.56<br>(-1.15, 8.26) | 0.475       |
| Fasting Insulin (mU/dL)             | 0.34<br>(-0.64, 1.33)  | 0.83<br>(0.31, 1.35)      | 0.94<br>(0.47, 1.41)       | 0.81<br>(-0.14, 1.76) | 0.532       |
| HOMA-IR                             | 0.09<br>(-0.19, 0.37)  | 0.24<br>(0.10, 0.39)      | 0.27<br>(0.14, 0.41)       | 0.28<br>(0.01, 0.55)  | 0.408       |
| HbA1c <sup>‡</sup>                  | 0.15<br>(0.09, 0.21)   | 0.18<br>(0.15, 0.21)      | 0.17<br>(0.15, 0.20)       | 0.23<br>(0.18, 0.28)  | 0.153       |

Least square means adjusted for age, center, race, sex, education, income, smoking, alcohol, wear time, log-transformed moderate-to-vigorous intensity physical activity (total minutes), and baseline covariate value (Model 2).

<sup>†</sup>Missing in 401 participants

<sup>‡</sup>Missing in 244 participants

SUPPLEMENTARY DATA

**Supplementary Table 3. Cross-sectional and 5-year Longitudinal Relationships between Sedentary Time and Continuous Metabolic Variables by Race**

|                           | Cross-sectional<br>(n=2,027)              |              | 5-year Change<br>(n=1,718)                |         |
|---------------------------|-------------------------------------------|--------------|-------------------------------------------|---------|
|                           | $\beta$<br>(% difference per<br>hour ST)* | p-value      | $\beta$<br>(5-year change<br>per hour ST) | p-value |
| Fasting Glucose (mg/dL)*  |                                           |              |                                           |         |
| Whites                    | -0.1%                                     | 0.845        | -0.01                                     | 0.960   |
| Blacks                    | 0.8%                                      | 0.141        | 0.48                                      | 0.178   |
| 2-hour Glucose (mg/dL)* † |                                           |              |                                           |         |
| Whites                    | -0.3%                                     | 0.671        | -0.45                                     | 0.570   |
| Blacks                    | 1.0%                                      | 0.275        | -0.87                                     | 0.390   |
| Fasting Insulin (mU/dL)*  |                                           |              |                                           |         |
| Whites                    | 1.4%                                      | 0.205        | 0.15                                      | 0.223   |
| Blacks                    | <b>3.7%</b>                               | <b>0.011</b> | 0.00                                      | 0.986   |
| HOMA-IR*                  |                                           |              |                                           |         |
| Whites                    | 1.4%                                      | 0.274        | 0.05                                      | 0.196   |
| Blacks                    | <b>4.5%</b>                               | <b>0.009</b> | 0.03                                      | 0.692   |
| HbA1c (%)*, ‡             |                                           |              |                                           |         |
| Whites                    | 0.5%                                      | 0.223        | 0.00                                      | 0.874   |
| Blacks                    | -0.2%                                     | 0.270        | 0.02                                      | 0.093   |

Abbreviations: ST, sedentary time

All models adjusted for age, center, race, sex, education, income, smoking, alcohol, wear time, baseline value (longitudinal model only), and log-transformed mvpa (total minutes)

\*Dependent variables were log transformed in cross-sectional models; thus  $\beta$  is presented as the % difference associated with each additional 1 hour increase in sedentary time.

†Missing in 400 participants at baseline and 401 participants at 5-year follow-up

‡Missing in 261 participants at baseline and 244 participants at 5-year follow-up

SUPPLEMENTARY DATA

**Supplementary Table 4. Cross-sectional and 5-year Longitudinal Relationships between Sedentary Time and Metabolic Outcomes**

|                                     | Prevalence      | Cross-sectional Analysis |                   |                  | Incidence*      | 5-year Longitudinal Analysis |            |                 |
|-------------------------------------|-----------------|--------------------------|-------------------|------------------|-----------------|------------------------------|------------|-----------------|
|                                     |                 | OR<br>(per hour ST)      | 95% CI            | <i>p</i> -value  |                 | OR<br>(per hour ST)          | 95% CI     | <i>p</i> -value |
| Impaired Fasting Glucose            | 537/1,866 (29%) |                          |                   |                  | 131/1,199 (11%) |                              |            |                 |
| Model 1: demographics and lifestyle |                 | 1.04                     | 0.97, 1.13        | 0.207            |                 | 1.04                         | 0.92, 1.19 | 0.470           |
| Model 2: + MVPA                     |                 | 0.99                     | 0.91, 1.07        | 0.726            |                 | 1.01                         | 0.87, 1.16 | 0.928           |
| Model 3: + comorbidities            |                 | 0.99                     | 0.91, 1.07        | 0.727            |                 | 1.01                         | 0.87, 1.17 | 0.902           |
| Impaired Glucose Tolerance          | 159/1,570 (10%) |                          |                   |                  | 107/1,159 (9%)  |                              |            |                 |
| Model 1: demographics and lifestyle |                 | <b>1.20</b>              | <b>1.06, 1.36</b> | <b>0.003</b>     |                 | 1.05                         | 0.91, 1.21 | 0.519           |
| Model 2: + MVPA                     |                 | 1.11                     | 0.97, 1.28        | 0.121            |                 | 1.01                         | 0.86, 1.18 | 0.932           |
| Model 3: + comorbidities            |                 | 1.11                     | 0.97, 1.28        | 0.127            |                 | 1.00                         | 0.85, 1.17 | 0.992           |
| Prediabetes by HbA1c                | 277/1,627 (17%) |                          |                   |                  | 198/1,190 (17%) |                              |            |                 |
| Model 1: demographics and lifestyle |                 | 0.97                     | 0.88, 1.06        | 0.451            |                 | 0.98                         | 0.89, 1.10 | 0.784           |
| Model 2: + MVPA                     |                 | 0.92                     | 0.83, 1.03        | 0.139            |                 | 0.94                         | 0.83, 1.06 | 0.289           |
| Model 3: + comorbidities            |                 | 0.92                     | 0.83, 1.03        | 0.167            |                 | 1.06                         | 0.81, 1.04 | 0.172           |
| Diabetes                            | 161/2,027 (8%)  |                          |                   |                  | 81/1,718 (5%)   |                              |            |                 |
| Model 1: demographics and lifestyle |                 | <b>1.29</b>              | <b>1.14, 1.45</b> | <b>&lt;0.001</b> |                 | 1.04                         | 0.89, 1.22 | 0.591           |
| Model 2: + MVPA                     |                 | <b>1.20</b>              | <b>1.06, 1.38</b> | <b>0.006</b>     |                 | 0.99                         | 0.83, 1.18 | 0.873           |
| Model 3: + comorbidities            |                 | <b>1.22</b>              | <b>1.06, 1.40</b> | <b>0.006</b>     |                 | 0.95                         | 0.79, 1.15 | 0.627           |

Abbreviations: CI, confidence interval; MVPA, moderate-to-vigorous physical activity; ST, sedentary time

Model 1: age, center, race, sex, education, income, smoking, alcohol, wear time, baseline value (longitudinal model only)

Model 2: Model 1 + log-transformed mvpa (total minutes)

Model 3: Model 2 + body mass index, hypertension and total cholesterol (+5-year change in longitudinal model)

\*Prevalent baseline cases excluded for each specific outcome
